# Supplementary material for: Developmental Validation of a MPS Workflow with a PCR-Based Short Amplicon Whole Mitochondrial Genome Panel
Source: MDPI journal article supplement (doi:10.3390/genes11111345), 2020-11-13
Supplement: s1 [file s1]

Supplementary Material

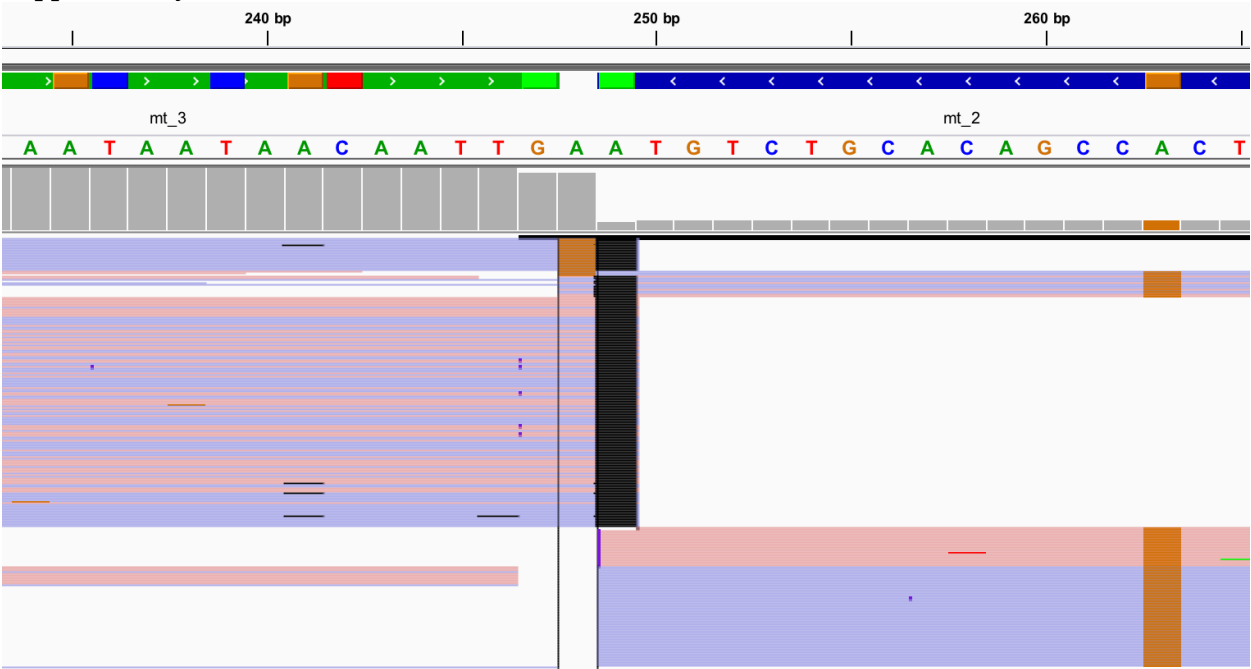

**Figure S1.** Screen shot from IGV of the alignment difficulties in the mt\_2 and mt\_3 amplicon overlap with a 249del present.

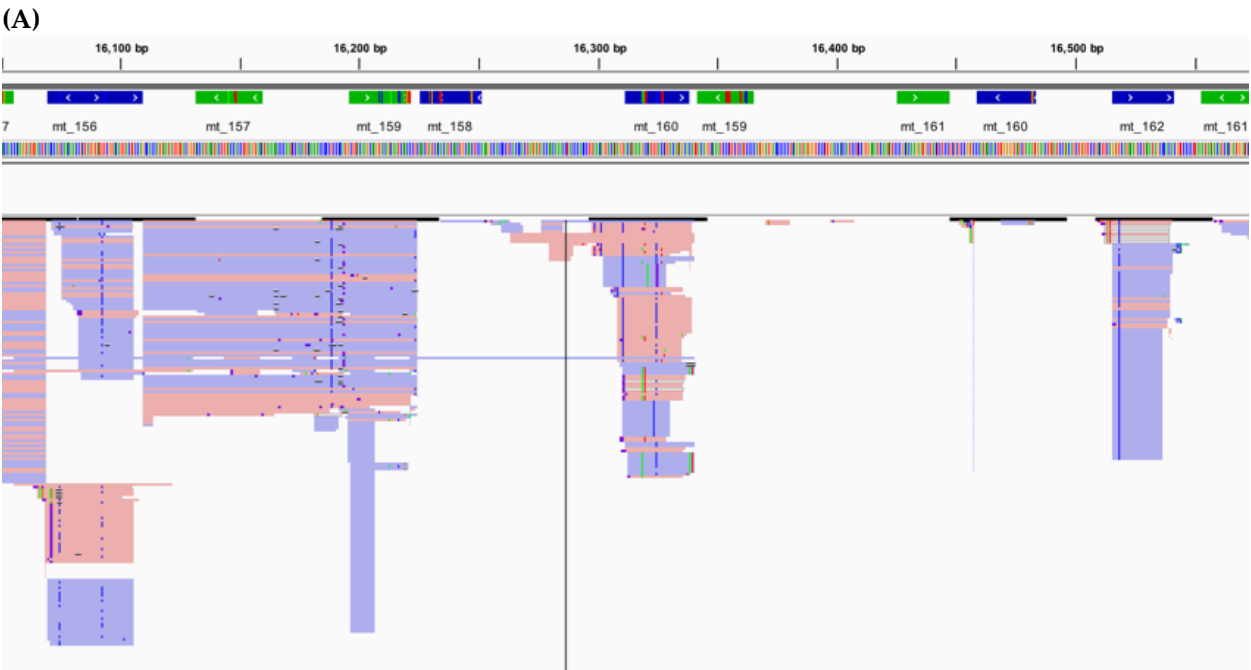

(B)

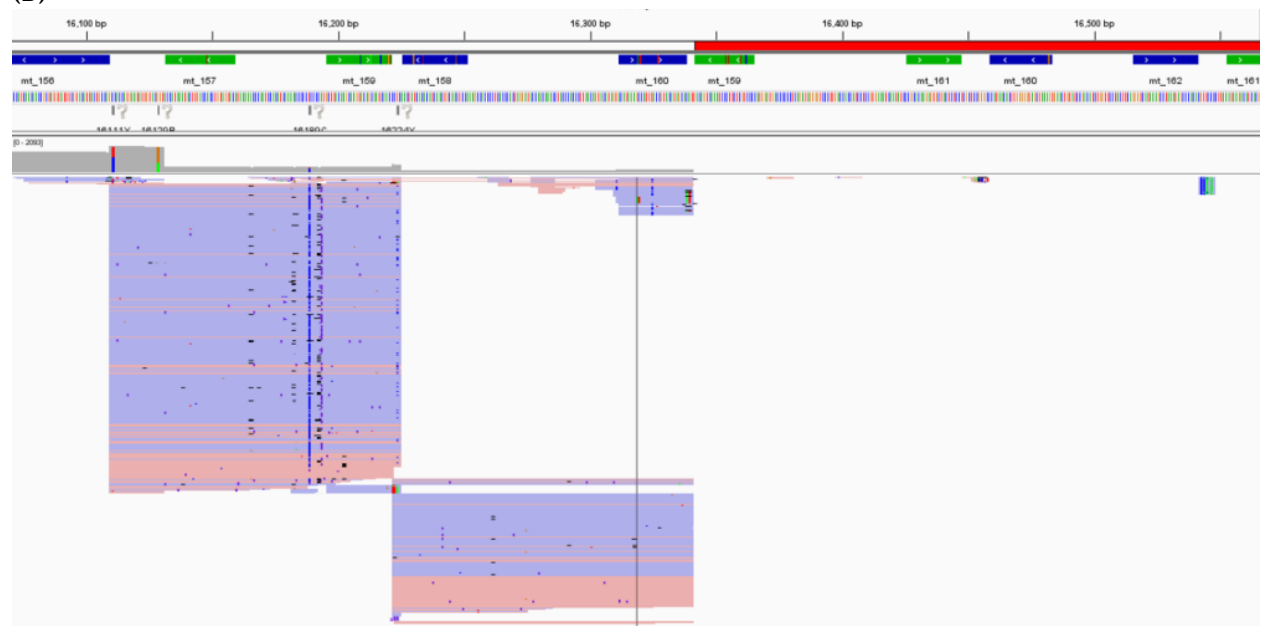

(C)

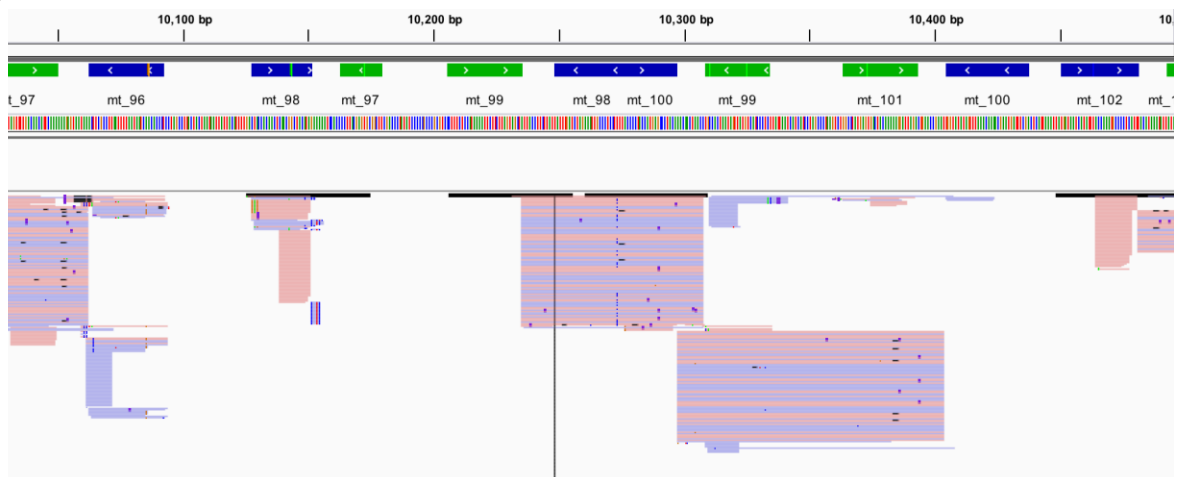

(D)

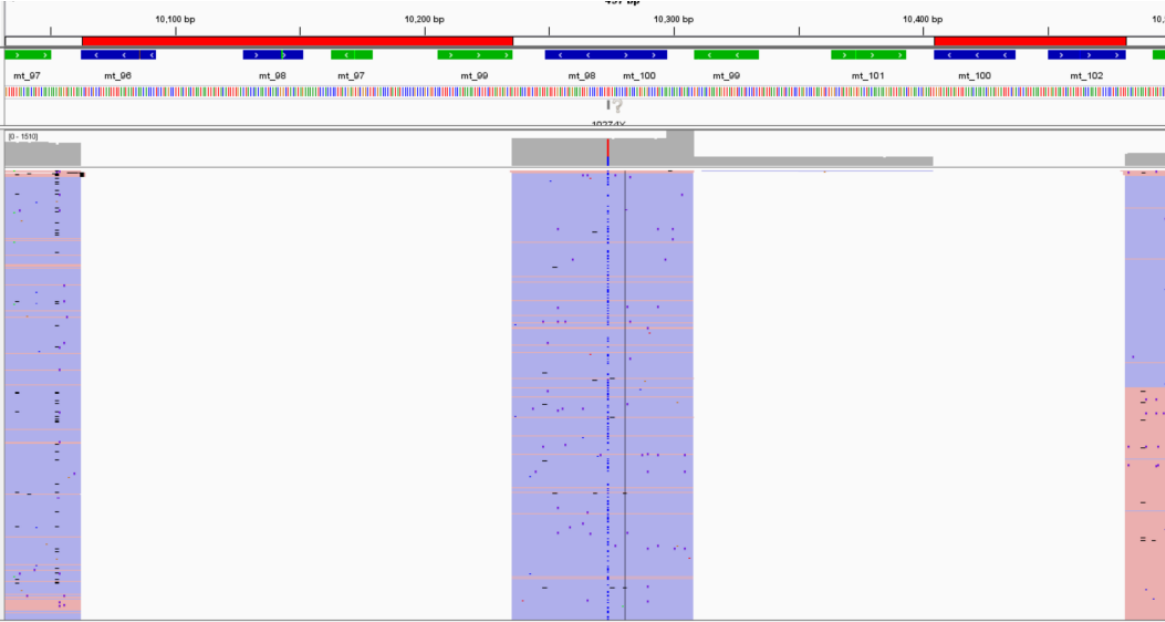

**Figure S2.** Screen shot from IGV of the reads from a negative control. A and B show the same region of the mtGenome prior to (A) and after (B) the latest Converge update. C and D show the same region of the mtGenome prior to (C) and after (D) the latest Converge update. The number of short reads is visibly less in B and D.

(A)

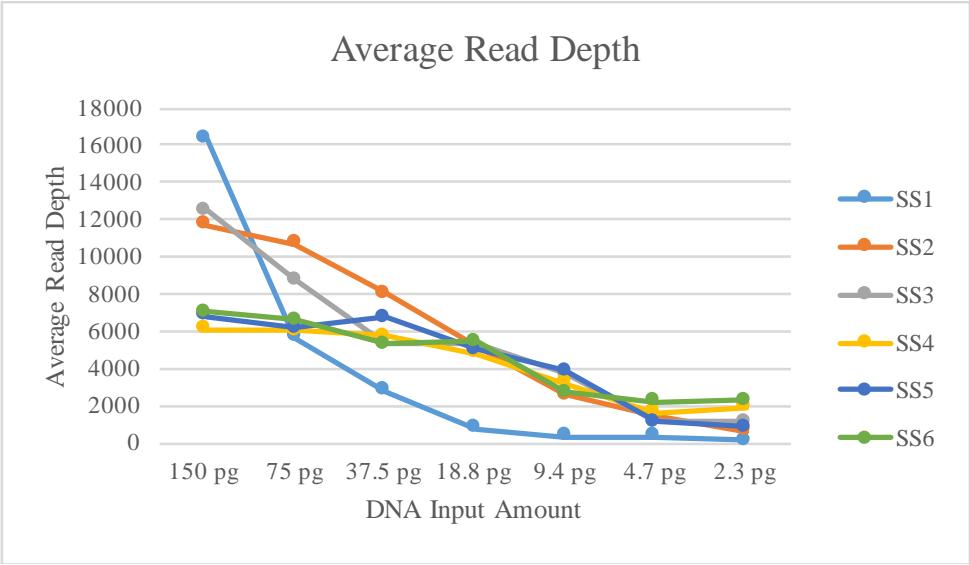

(B)

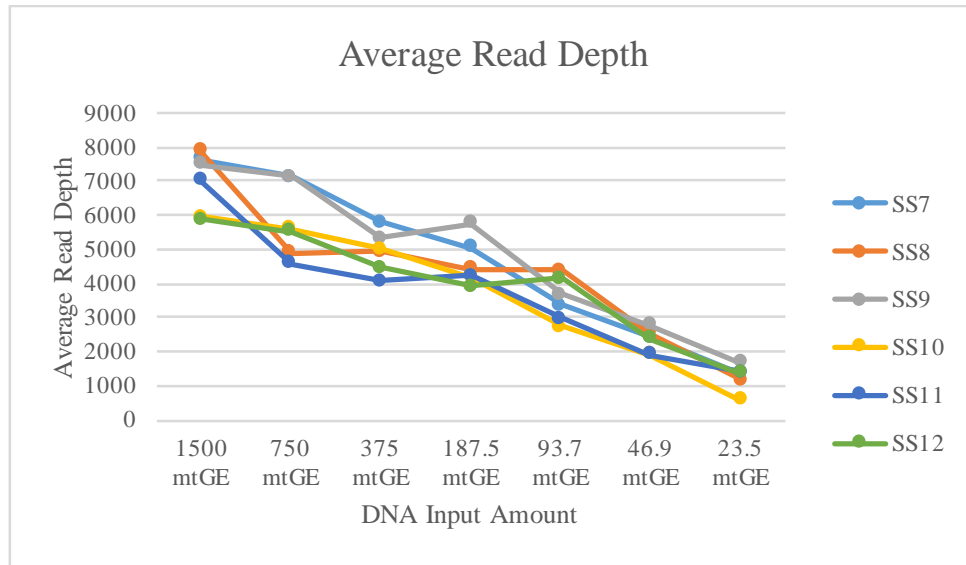

**Figure S3. (A)** Average read depth across the mtGenome for the six nuclear DNA quantitated dilution series samples. **(B)** Average read depth across the mtGenome for the six mtDNA quantitated dilution series samples.

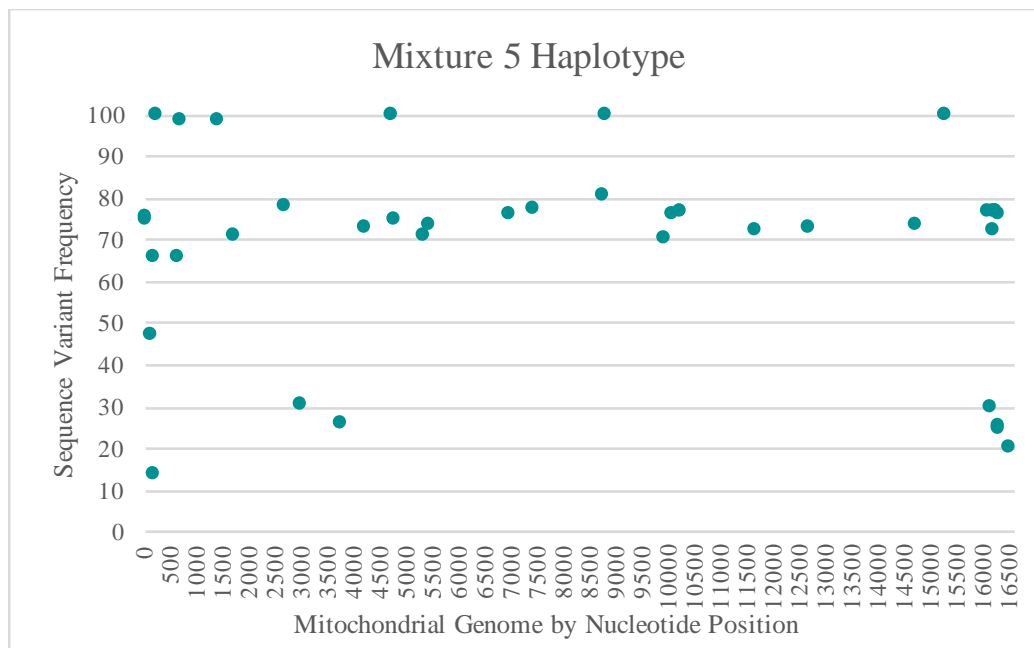

**Figure S4.** The sequence variant frequencies for one of the 2:1 mixtures included in Sequencing Run 31 were plotted against the nucleotide position of that sequence variant to illustrate the quantitative contribution of each contributor to the total read depth of the mixed haplotype. The sequence variants present in both contributors, the major contributor, and the minor contributor cluster together with the personal point heteroplasmy present in each contributor falling out of these clusters.

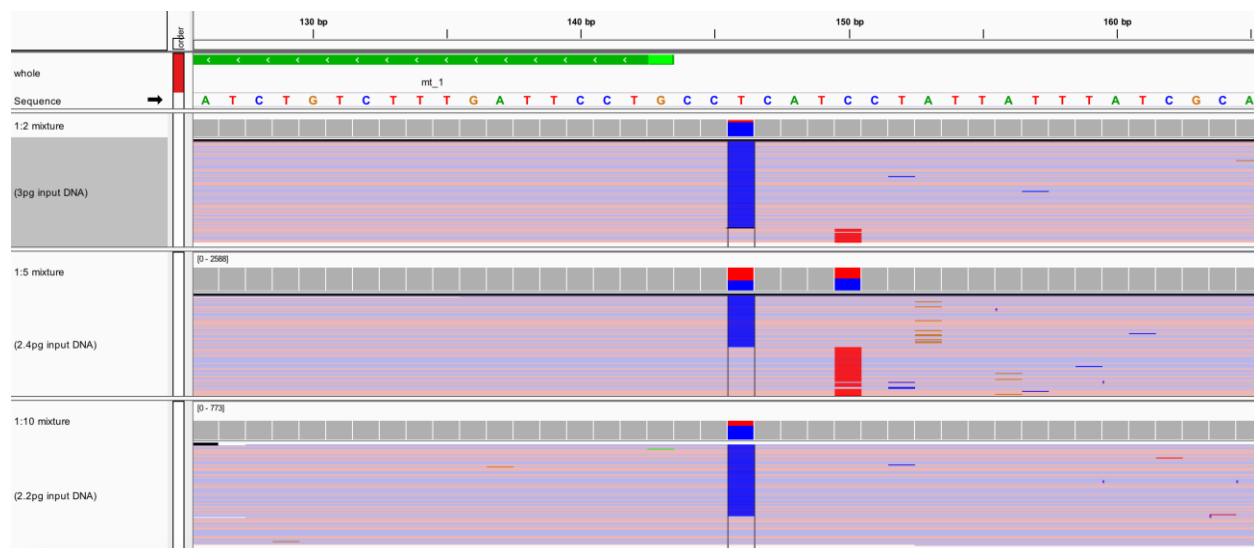

**Figure S5.** Screen shot from IGV illustrating the stochastic effects (i.e., variable sequence variant frequencies and drop-out) that can take place when amplifying lower amounts of input DNA, increasing the difficulty of deconvolution from these mixtures in mixture series 1 (Sequencing Run 29).

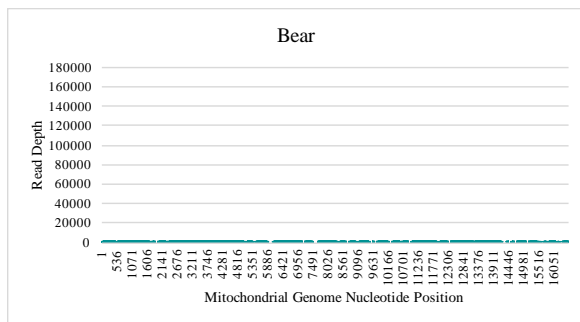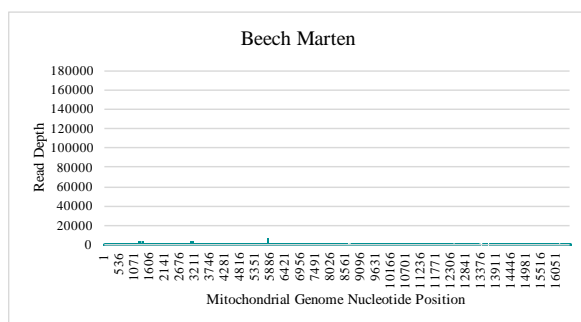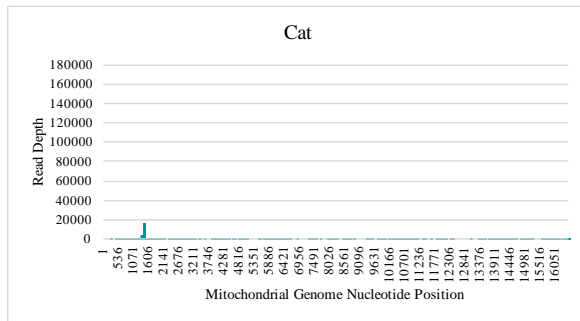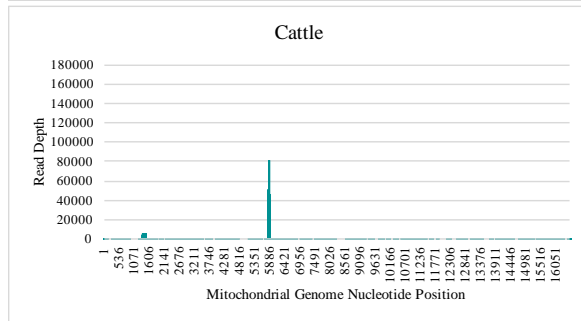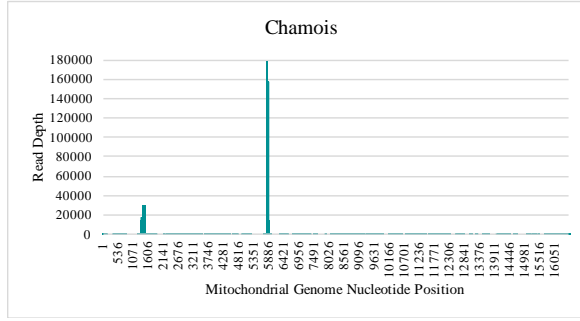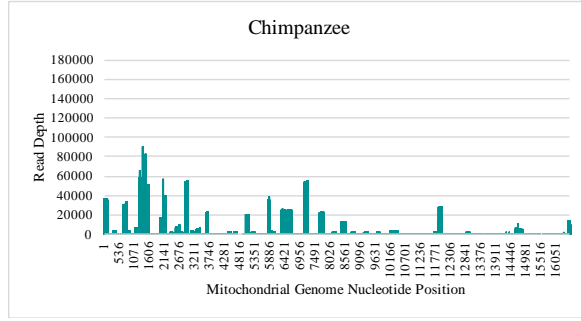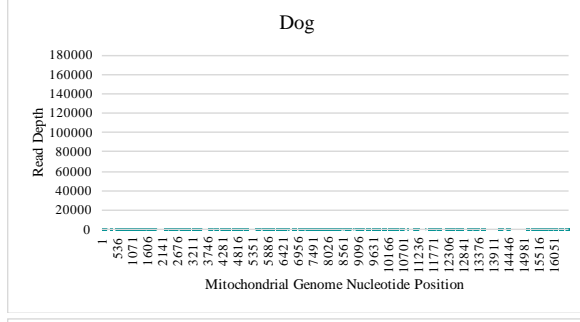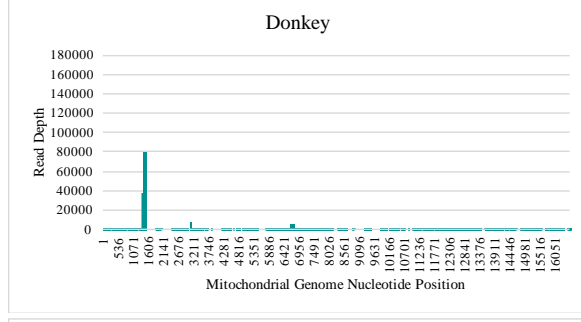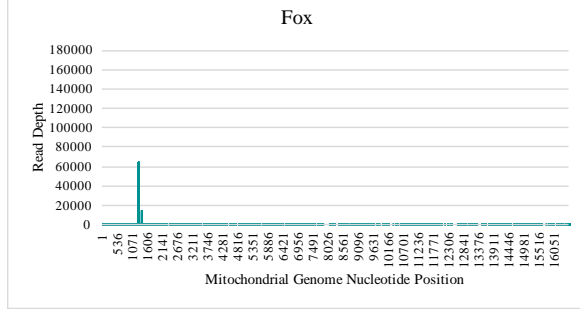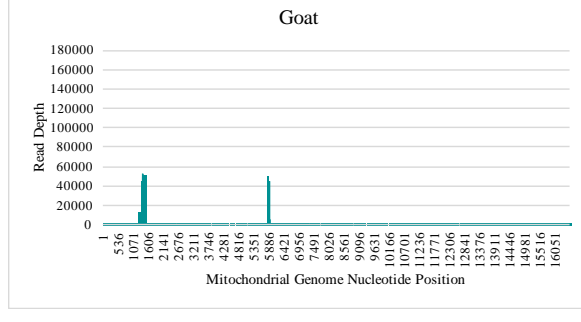

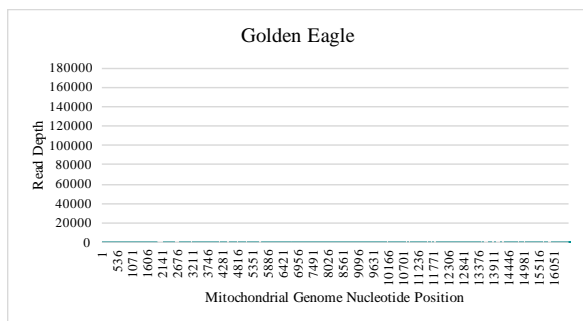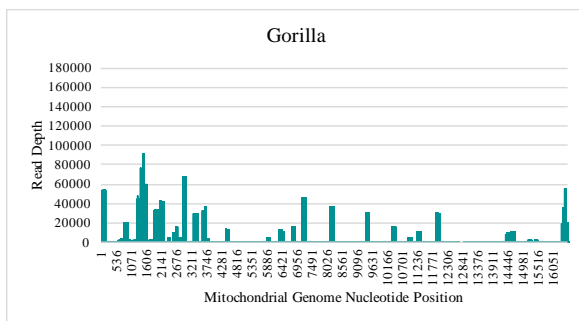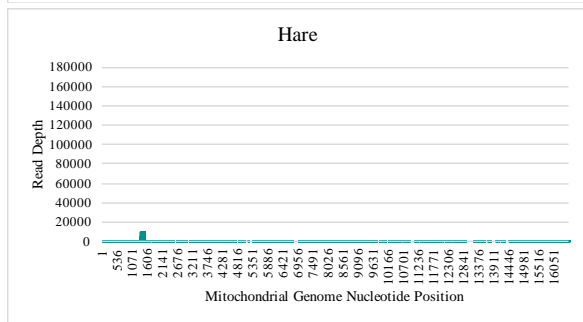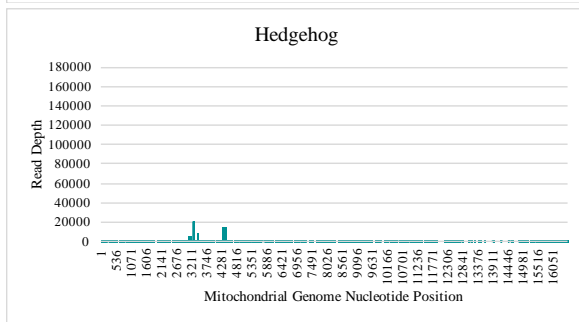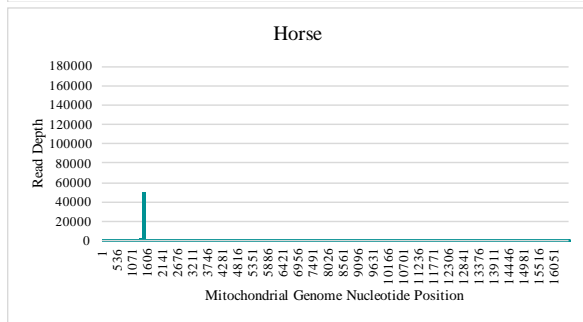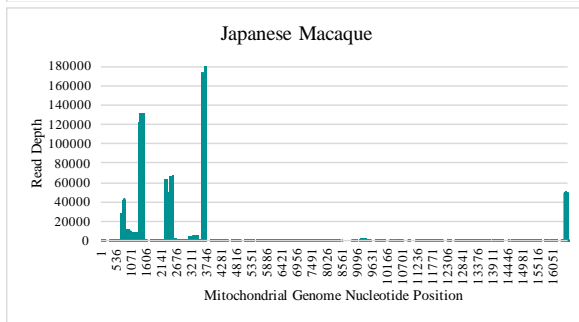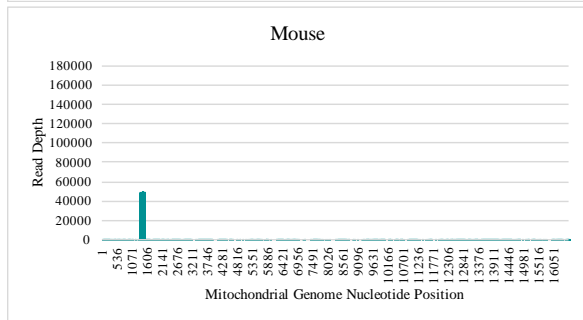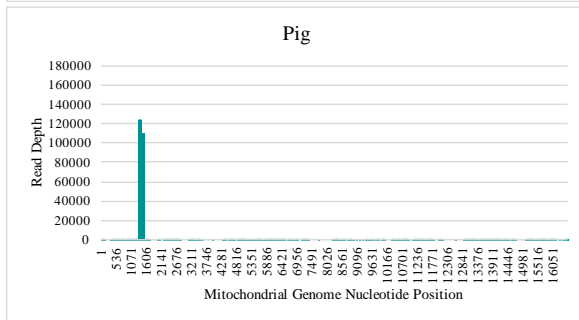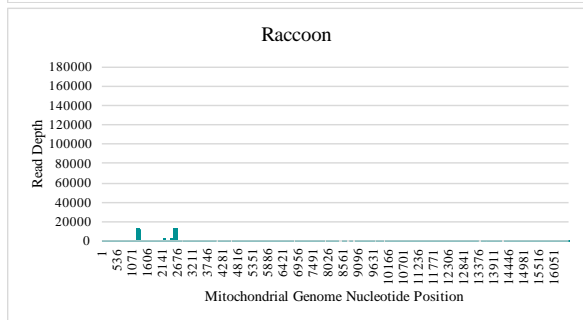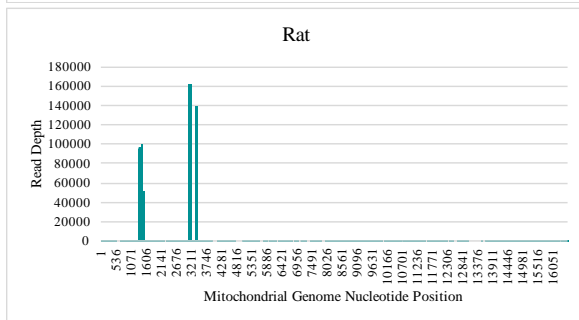

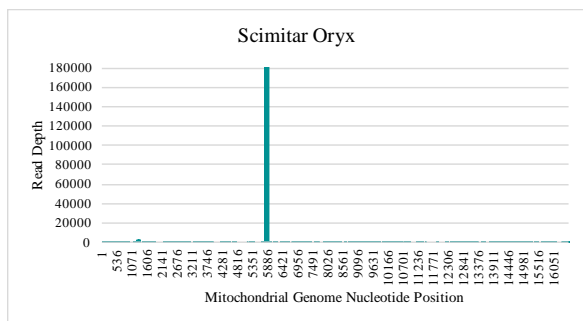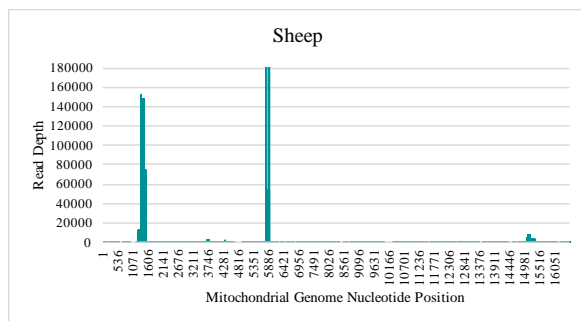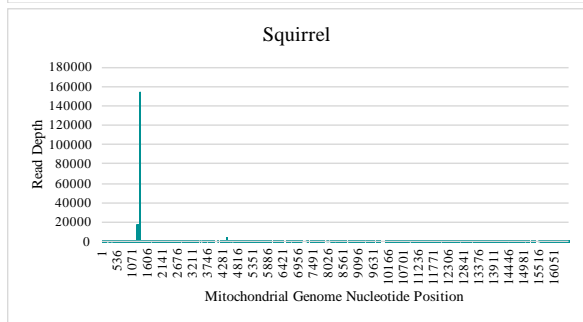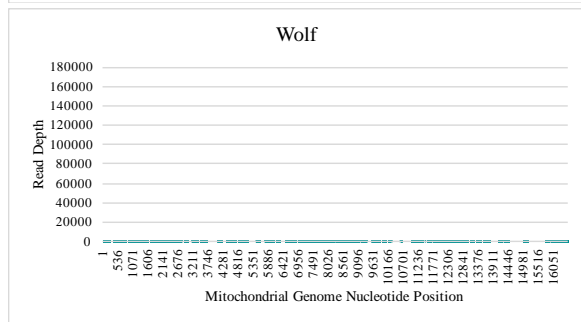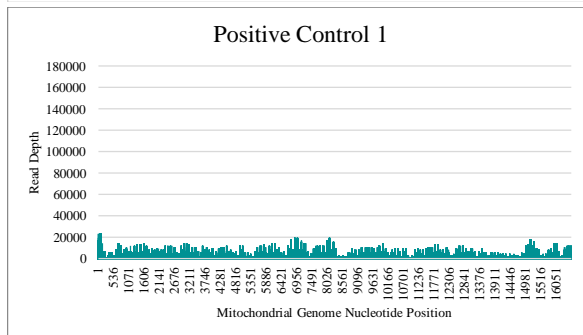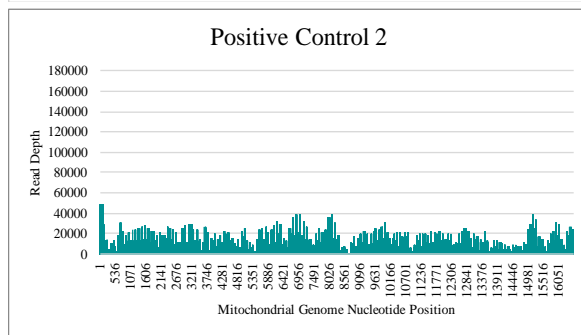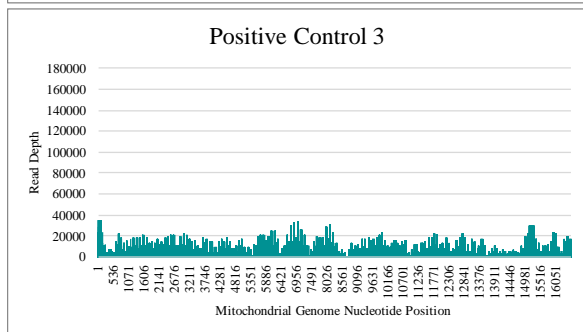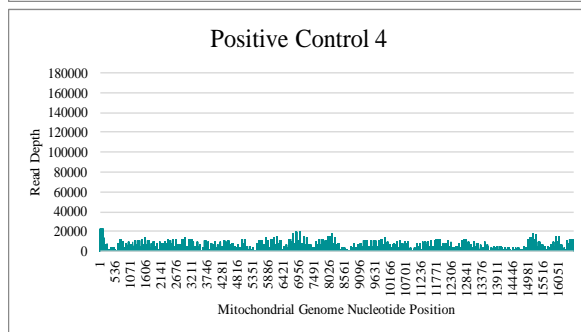



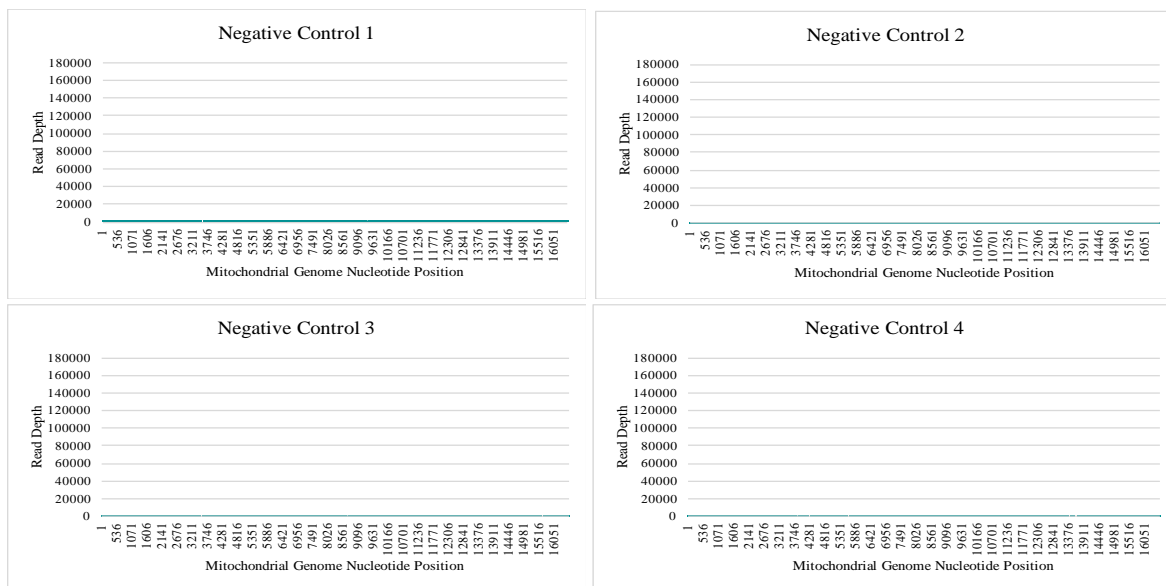

**Figure S6.** Read depth for each nucleotide position across the rCRS reference genome for each of the 24 vertebrate DNAs, four positive controls, and four negative controls included in the species specificity run. The X- and Y-axis for each chart has been scaled the same to allow for comparisons.
